# Supplementary material for: Tip60 Phosphorylation at Ser 99 Is Essential for Autophagy Induction in Bombyx mori
Source: PubMed Central journal article supplement (PMC7555017; doi:10.3390/ijms21186893), 2020-09-20
Supplement: ijms-21-06893-s001.pdf [file ijms-21-06893-s001.pdf]

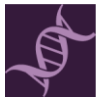

1 **Supplementary Materials:**

2 **Figure S1:** Bioinformatics analysis of *Bm Tip60* in silkdatabse3.0.

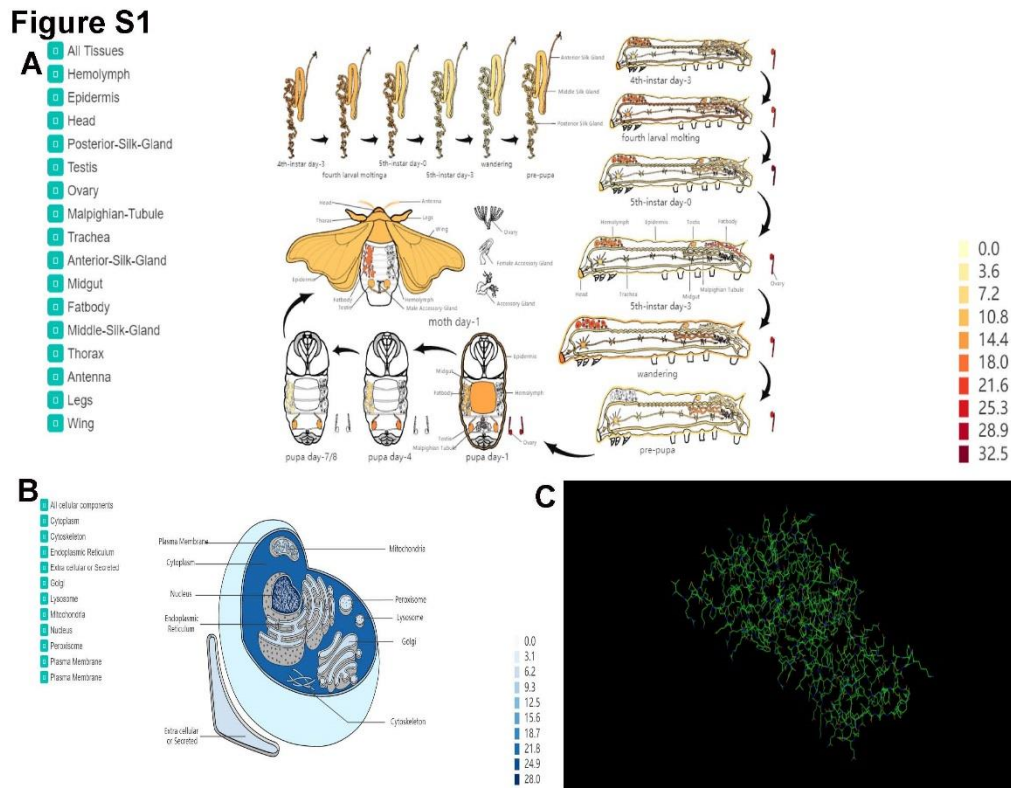

3

4 **Supplementary Figure S1.** Bioinformatics analysis of *Bm Tip60* in silkdatabse3.0. **(A)** The  
 5 expression values of *Bm Tip60* in 17 tissues at different growing stages (instar, larval, wandering,  
 6 pupa, and moth) is indicated by different colors. Light yellow: expression value is 0, deep red:  
 7 the highest expression value. **(B)** The predicted subcellular localization of *Bm Tip60*. **(C)** 3D  
 8 model of molecular structure of *Bm Tip60* protein, red color:  $\alpha$ -helix, green color:  $\beta$ -sheet, and dark blue  
 9 color: random coil.

10 **Table S1:** *GeneIDs* used in phylogenetic tree study

11

**Table S1.** *GeneIDs* used in phylogenetic tree

| Species                     | GeneID         |
|-----------------------------|----------------|
| <i>Acyrtosiphon pisum</i>   | XP_008181995.1 |
| <i>Aedes aegypti</i>        | XP_021706851.1 |
| <i>Amyelois transitella</i> | XP_013194528.1 |
| <i>Apis dorsata</i>         | XP_006618580.1 |
| <i>Bemisia tabaci</i>       | XP_018900801.1 |
| <i>Bicyclus anynana</i>     | XP_023947155.1 |

|                                  |                |
|----------------------------------|----------------|
| <i>Bombyx mori</i>               | XP_004928298.1 |
| <i>Caenorhabditis elegans</i>    | NP_504796.1    |
| <i>Ceratitis capitata</i>        | XP_004530447.1 |
| <i>Culex quinquefasciatus</i>    | XP_001842875.1 |
| <i>Drosophila melanogaster</i>   | NP_001259234.1 |
| <i>Fopius arisanus</i>           | XP_011302800.1 |
| <i>Helicoverpa armigera</i>      | XP_021201592.1 |
| <i>Homo sapiens</i>              | NP_874369.1    |
| <i>Leptinotarsa decemlineata</i> | XP_023025142.1 |
| <i>Mus musculus</i>              | NP_848752.1    |
| <i>Ostrinia furnacalis</i>       | XP_028156455.1 |
| <i>Papilio polytes</i>           | XP_013139927.1 |
| <i>Papilio xuthus</i>            | XP_013173093.1 |
| <i>Plutella xylostella</i>       | XP_011547865.1 |
| <i>Saccharomyces cerevisia</i>   | EDZ69167.1     |
| <i>Spodoptera litura</i>         | XP_022826725.1 |
| <i>Trichoplusia ni</i>           | XP_026731014.1 |

1

2

3 **Table S2:** The primers used in this study

4

**Table S2.** Primers used for vector construction

| Primer name      | Primer sequences <sup>1</sup> (5' to 3')                                             |
|------------------|--------------------------------------------------------------------------------------|
| <i>BmTip60-F</i> | CATG <u>CCATGG</u> CAATGAACGAAAATGATGATGAATTGACAACA                                  |
| <i>BmTip60-R</i> | CGGGGTACCTCACGTAGAATCGAGACCGAGGAGAGGGTTAGGGATAGG<br>CTTACCCCATTTGCCCCGTTTAGACCAATCTT |
| <i>BmAtg8-F</i>  | GGAAGATCTGAAATTCCAATACAAAGAAG                                                        |
| <i>BmAtg8-R</i>  | CGGGGTACCTTAATTTCCATAGACATTTTCGTC                                                    |

5

<sup>1</sup>Sequences in underlined represent enzyme cutting sites. CCATGG indicated Nco I enzyme site,

6

GGTACC indicated Kpn I enzyme site, AGATCT indicated Bgl II enzyme site.
